# Supplementary material for: Chemistry of BDI*M(2+) complexes (M = Mg, Zn) and their role in lactide polymerization where BDI* is the anion derived from methylenebis(C-tBu, N-2,6-diisopropylphenyl)imine BDI*H
Source: Royal Society of Chemistry journal article supplement (doi:10.1039/b910669c), 2009-01-01
Supplement: b910669c.pdf [file b910669c.pdf]

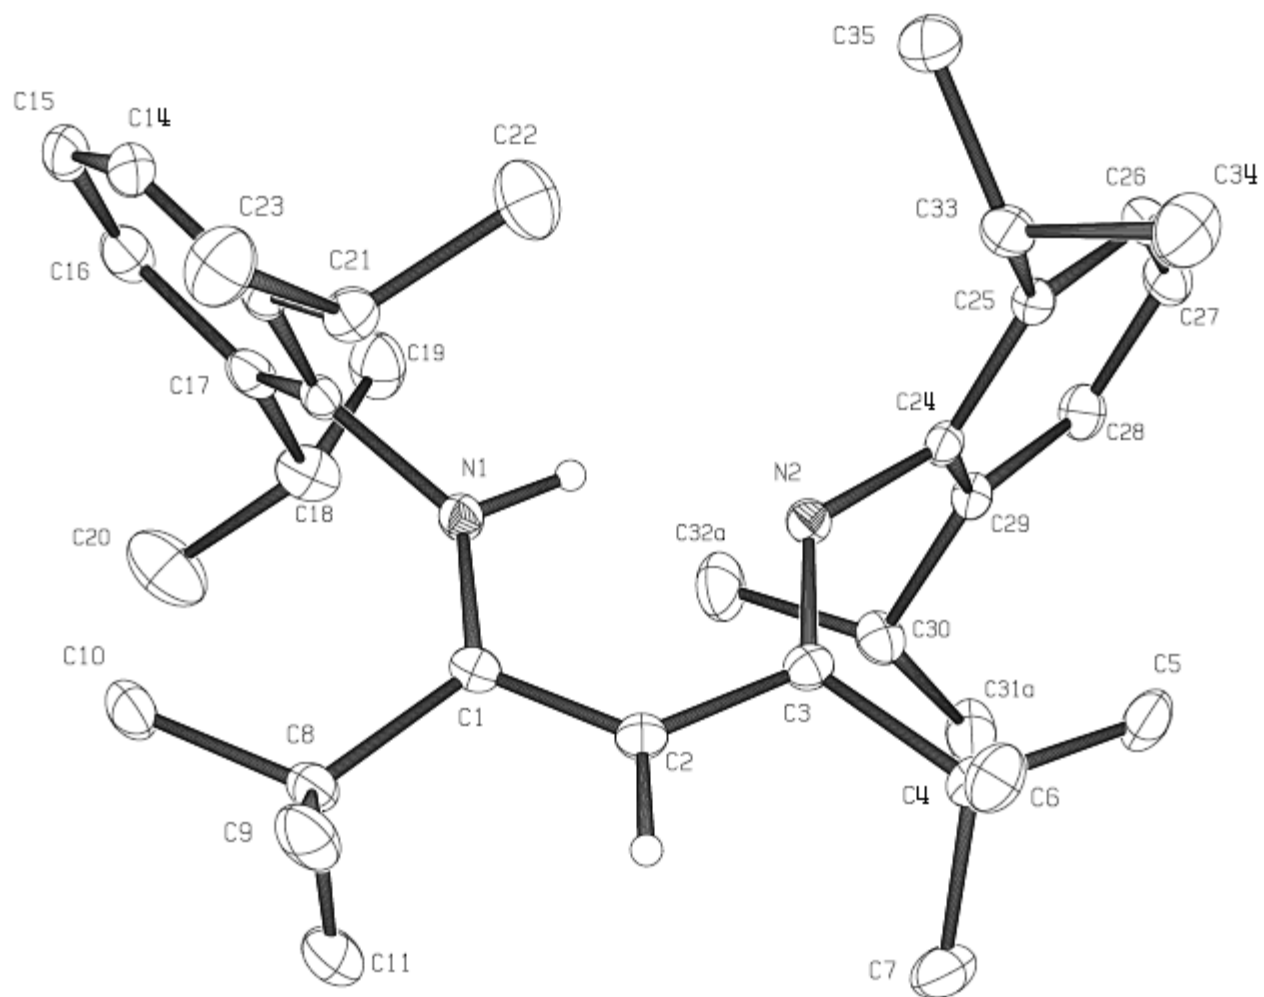

Ortep plot of 3a with 30% probability ellipsoids. Most of the hydrogen atoms are omitted for clarity. Only one set of atoms for the disordered isopropyl group [C(31a) and C(32a)] is shown.

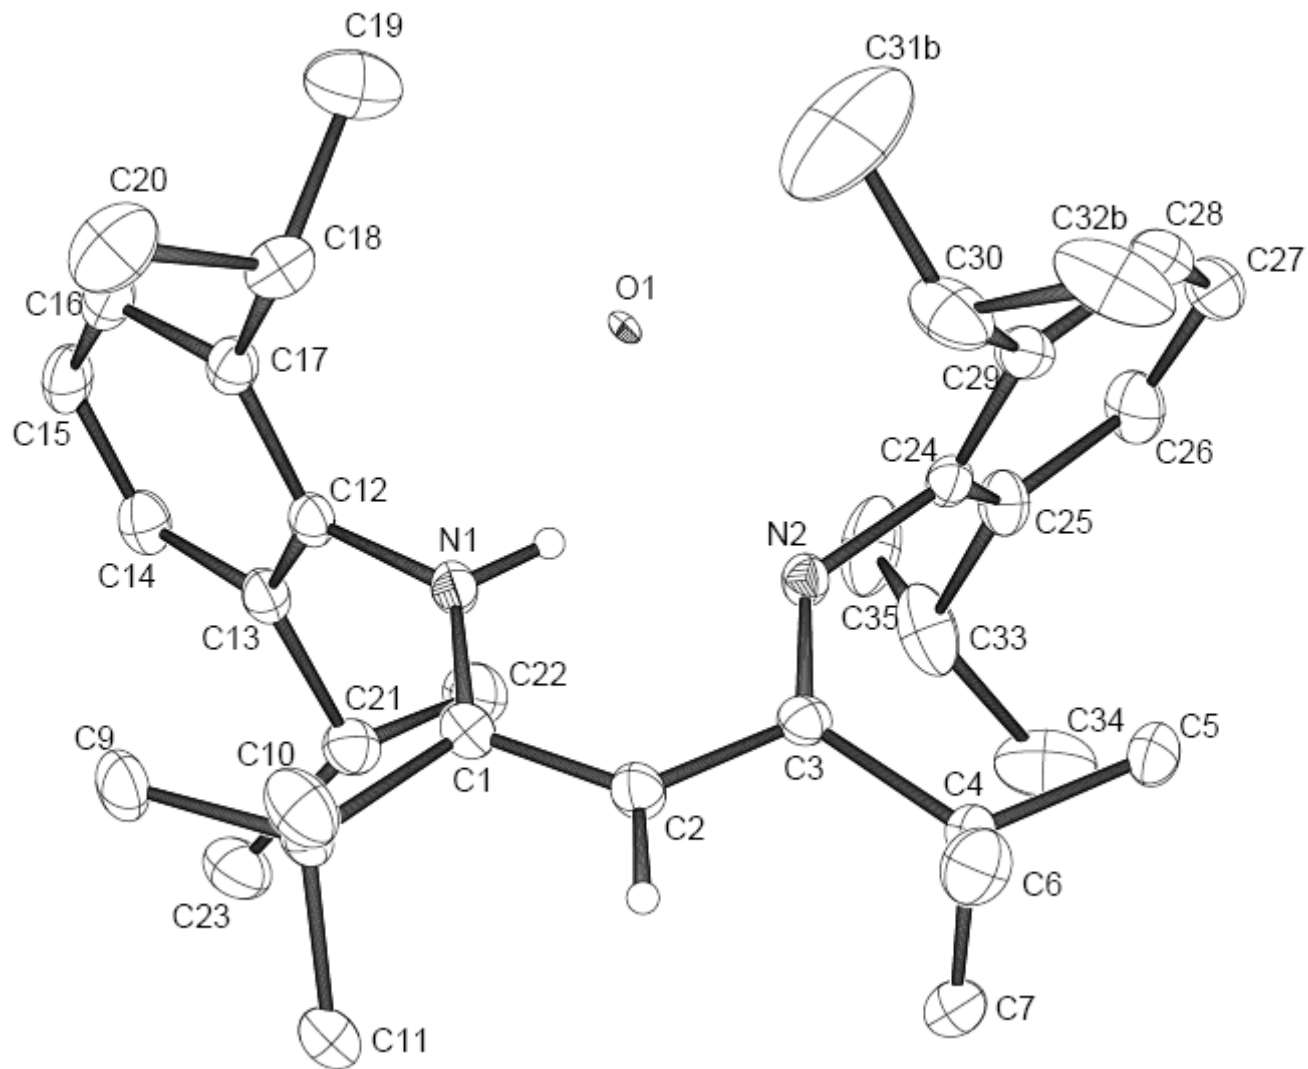

Ortep plot of 3b with 30% probability ellipsoids. Most of the hydrogen atoms are omitted for clarity. Only one set of atoms for the disordered isopropyl group [C(31b) and C(32b)] is shown.

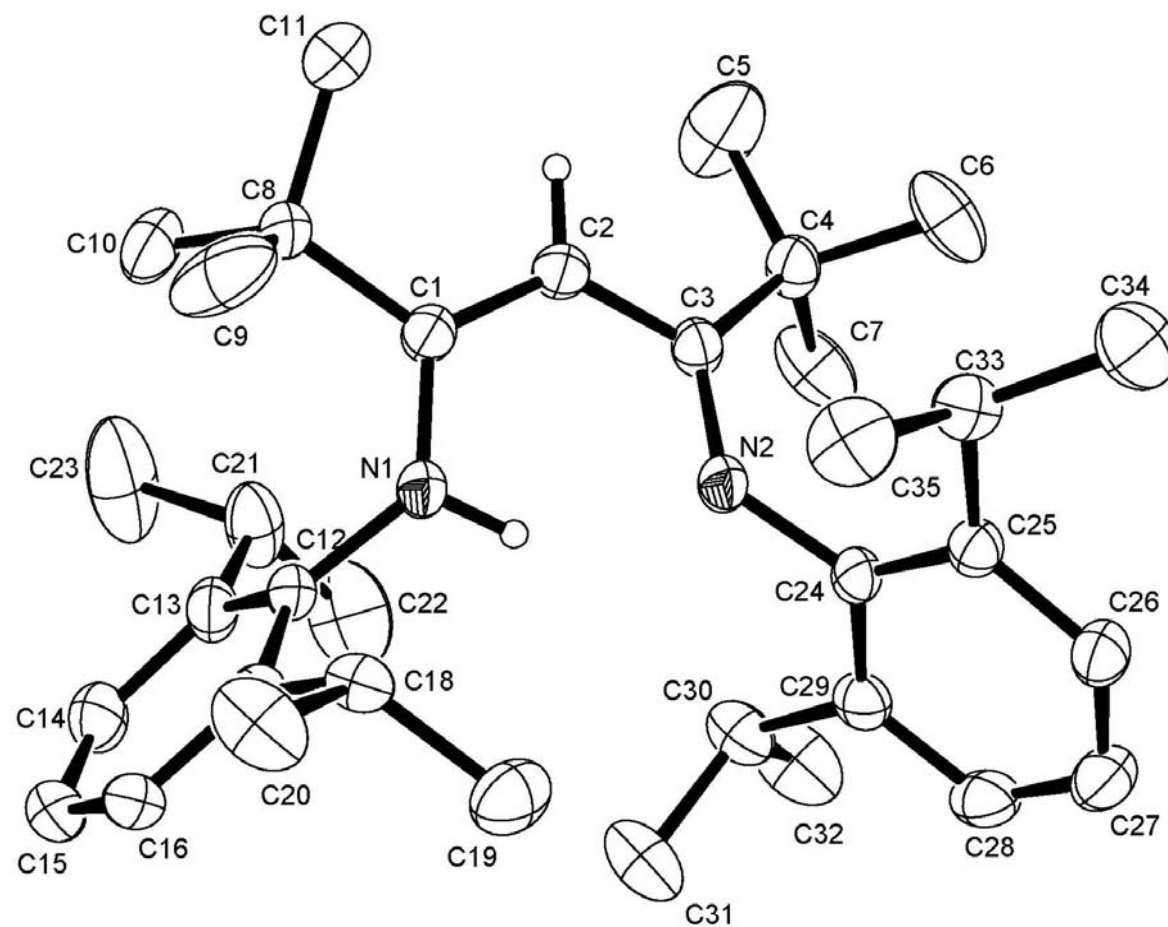

Ortep plot for 3c for the molecule on the general position and drawn with 30% probability ellipsoids. Only two hydrogen atoms are drawn for clarity.

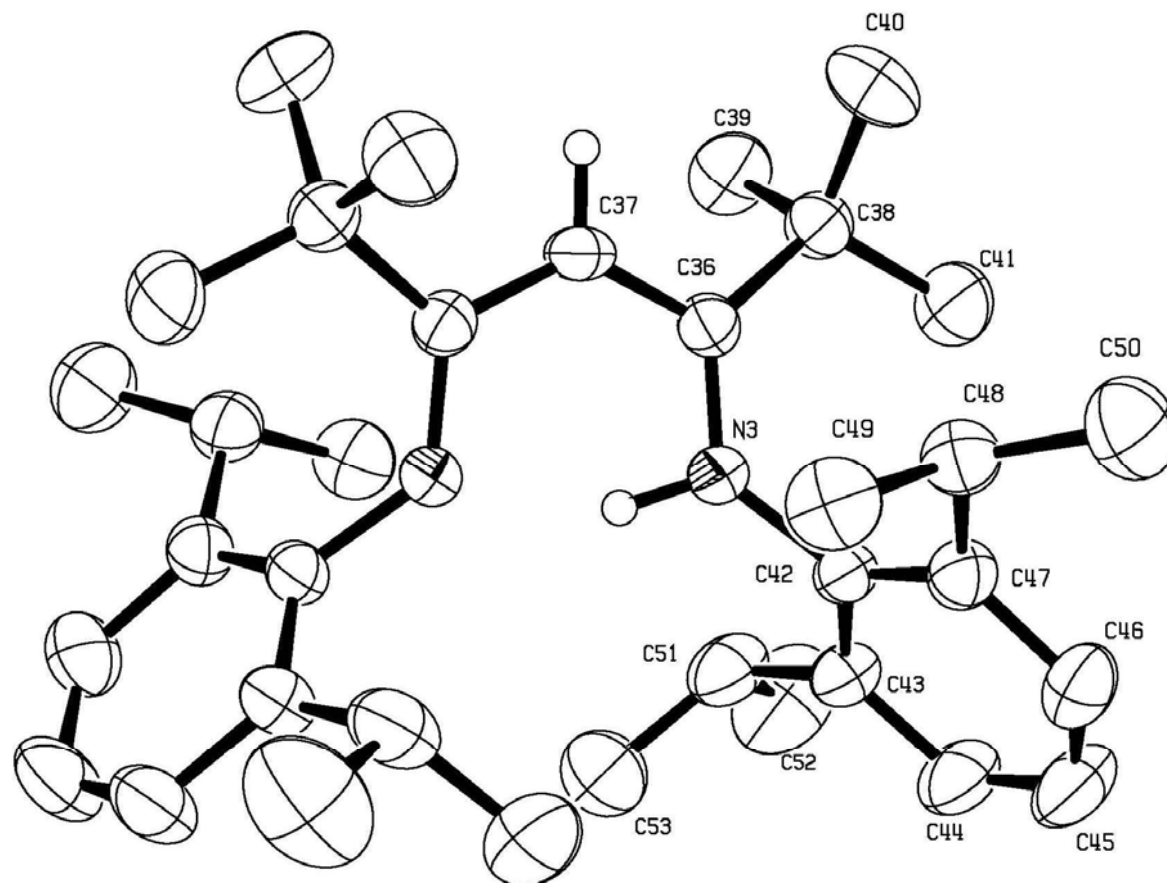

Ortep plot of 3c for the molecule containing a crystallographic two-fold rotation axis, and drawn with 50% probability ellipsoids. Only two hydrogen atoms are drawn.
